# Supplementary material for: Utilizing the Intrinsic Thermal Instability of Swedenborgite Structured YBaCo4O7+δ as an Opportunity for Material Engineering in Lithium-Ion Batteries by Er and Ga Co-Doping Processes
Source: MDPI journal article supplement (doi:10.3390/ma14164565), 2021-08-14
Supplement: s1 [file s1]

# Utilizing the Intrinsic Thermal Instability of Swedenborgite Structured $\text{YBaCo}_4\text{O}_{7+\delta}$ as an Opportunity for Material Engineering in Lithium-Ion Batteries by Er and Ga Co-Doping Processes

Sanghyuk Park <sup>1,†</sup>, Kwangho Park <sup>2,†</sup>, Ji-Seop Shin <sup>2</sup>, Gyeongbin Ko <sup>1</sup>, Wooseok Kim <sup>1</sup>, Jun-Young Park <sup>2,\*</sup> and Kyungjung Kwon <sup>1,\*</sup>

<sup>1</sup> Department of Energy & Mineral Resources Engineering, Sejong University, Seoul 05006, Korea; shpark@sejong.ac.kr (S.P.); radsfl@naver.com (G.K.); kevin5588@naver.com (W.K.)

<sup>2</sup> HMC, Department of Nanotechnology and Advanced Materials Engineering, Sejong University, Seoul 05006, Korea; beongae430@naver.com (K.P.); sjs93623@nate.com (J.-S.S.)

\* Correspondence: jyoung@sejong.ac.kr (J.-Y.P.); kfromberk@gmail.com (K.K.); Tel.: +82-2-3408-3947 (K.K.)

† These authors contributed equally to this work.

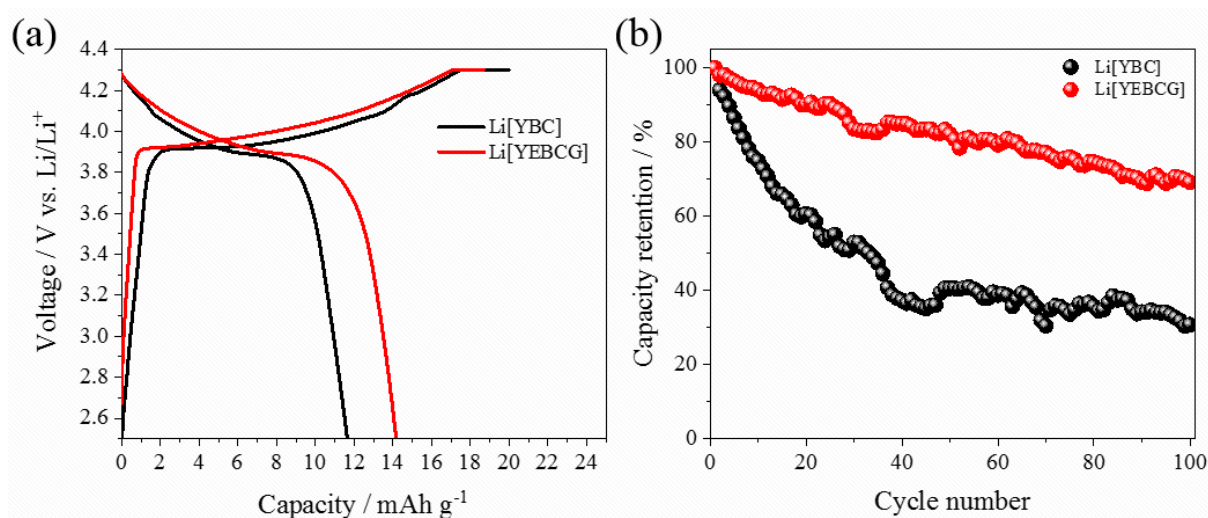

Figure S1. (a) Initial charge/discharge curves and (b) long-term cycle performance of Li[YBC] and Li[YEBCG] in a potential range of 2.5–4.3 V.

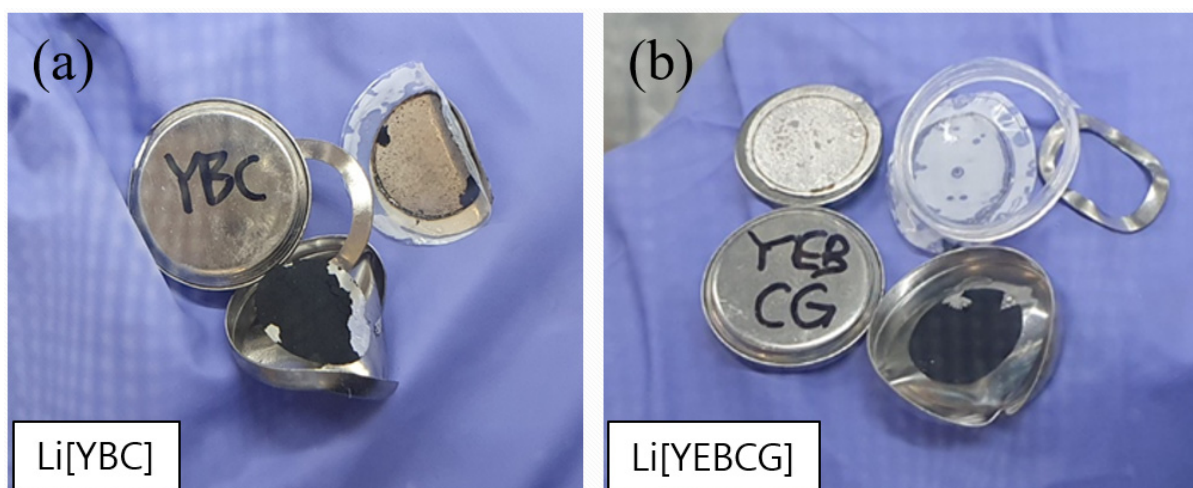

Figure S2. Comparative pictures of (a) Li[YBC] and (b) Li[YEBCG] after the cycling test, representing intrinsically weak adhesion property of Li[YBC] with current collectors.

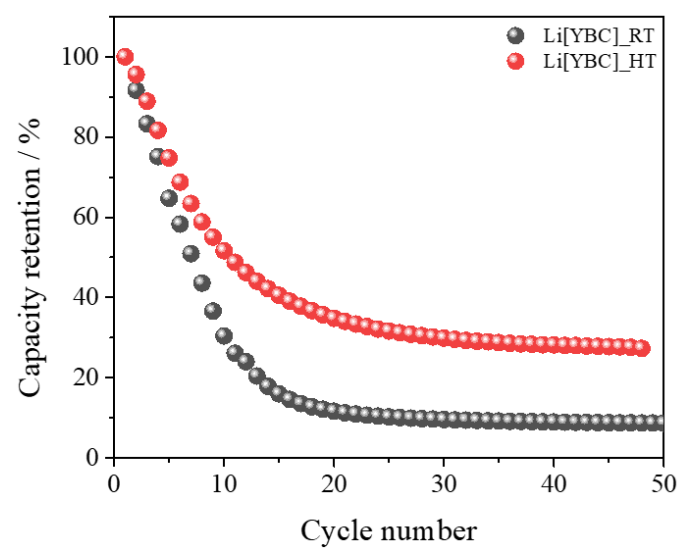

Figure S3. Cycle performance of Li[YBC] at different temperatures of 25 and 60 °C.
